# Supplementary material for: Optimizing CO2 photoreduction on bismuth oxyhalides via intrinsic and extrinsic techniques
Source: Royal Society of Chemistry journal article supplement (doi:10.1039/d3ta06943e), 2023-12-13
Supplement: d3ta06943e1.pdf [file d3ta06943e1.pdf]

## Supplementary Information

### Optimizing CO<sub>2</sub> photoreduction on bismuth oxyhalides via intrinsic and extrinsic techniques

Malik Zeeshan Shahid<sup>a</sup>, Zhihao Chen<sup>a</sup>, Rashid Mehmood<sup>b</sup>, Meng Zhang<sup>a</sup>, Danrui Pan<sup>a</sup>, Shishun Xu<sup>a</sup>, Umar Farooq<sup>a</sup>, Ahmed Mahmoud Idris<sup>a</sup>, Zhengquan Li<sup>a,c\*</sup>

<sup>a</sup>Key Laboratory of the Ministry of Education for Advanced Catalysis Materials, Zhejiang Normal University, Jinhua, Zhejiang 321004, P. R. China

<sup>b</sup>State Key Laboratory of Catalysis, iChEM, Dalian Institute of Chemical Physics, Chinese Academy of Sciences, Dalian National Laboratory for Clean Energy, Dalian 116023, China

<sup>c</sup>Zhejiang Institute of Photoelectronics, Zhejiang Normal University, Jinhua, Zhejiang 321004, China

\*Corresponding author: [zqli@zjnu.edu.cn](mailto:zqli@zjnu.edu.cn)

**Table S1.** PCR activity of diverse BiOX photocatalysts regulated *via* intrinsic or extrinsic techniques in the past decade.

**BiOX photocatalysts tuned with Intrinsic techniques for PCR**

| Entry # | Photocatalyst                                     | Mass (mg) | PCR conditions                                                                                  | Products ( $\mu\text{mol.g}^{-1}.\text{hr}^{-1}$ ) |                 |                    | Ref. |
|---------|---------------------------------------------------|-----------|-------------------------------------------------------------------------------------------------|----------------------------------------------------|-----------------|--------------------|------|
|         |                                                   |           |                                                                                                 | CO                                                 | CH <sub>4</sub> | CH <sub>3</sub> OH |      |
| 1       | BiOCl                                             | 50        | 10 mL H <sub>2</sub> O, CO <sub>2</sub> gas                                                     | 8.99                                               | ~0.5            | ~0.3               | [1]  |
| 2       | BiOCl                                             | 50        | 1.3 g NaHCO <sub>3</sub> , 10 mL H <sub>2</sub> SO <sub>4</sub> (4mol/L)                        | 19.7                                               | ~0.7            |                    | [2]  |
| 3       | BiOCl                                             | 10        | H <sub>2</sub> O vapor, CO <sub>2</sub> gas                                                     | 14.9                                               | -               | -                  | [3]  |
| 4       | BiOCl                                             | 100       | 2 mL H <sub>2</sub> O, CO <sub>2</sub> gas                                                      | 15.33                                              | -               | -                  | [4]  |
| 5       | BiOCl                                             | 5         | H <sub>2</sub> O vapor, CO <sub>2</sub> gas                                                     | 14.51                                              | -               | -                  | [5]  |
| 6       | BiOCl                                             | 50        | 100 mL H <sub>2</sub> O, CO <sub>2</sub> gas                                                    | 188.2                                              | -               | -                  | [6]  |
| 7       | BiOCl                                             | 20        | 50 mL H <sub>2</sub> O, CO <sub>2</sub> gas                                                     | 21.4                                               | -               | -                  | [7]  |
| 8       | BiOCl-SP                                          | 5         | 50 mL H <sub>2</sub> O, CO <sub>2</sub> gas                                                     | 89.72                                              | -               | -                  | [8]  |
| 9       | BiOCl-(Bi <sub>vac</sub> )                        | 20        | H <sub>2</sub> O vapor, CO <sub>2</sub> gas                                                     | 21.99                                              | -               | -                  | [9]  |
| 10      | BiOBr                                             | 10        | H <sub>2</sub> O vapor, CO <sub>2</sub> gas                                                     | 88.1                                               | 5.8             | -                  | [10] |
| 11      | BiOBr                                             | 30        | 10 mL H <sub>2</sub> O, 2.8 g NaHCO <sub>3</sub> , 7 mL H <sub>2</sub> SO <sub>4</sub> (4mol/L) | 4.55                                               | 7.1             | -                  | [11] |
| 12      | BiOBr                                             | 30        | 50 mL H <sub>2</sub> O, CO <sub>2</sub> gas                                                     | 20.1                                               | -               | -                  | [12] |
| 13      | BiOBr                                             | 10        | H <sub>2</sub> O vapor, CO <sub>2</sub> gas                                                     | 263.2                                              | 3.3             | -                  | [13] |
| 14      | BiOBr                                             | 30        | 50 mL H <sub>2</sub> O, CO <sub>2</sub> gas                                                     | 2.03                                               | -               | -                  | [14] |
| 15      | BiOIO <sub>3</sub>                                | 20        | 1.7 g NaHCO <sub>3</sub> , 15 mL, H <sub>2</sub> SO <sub>4</sub> (4mol/L)                       | 17.33                                              | ~0.02           | -                  | [15] |
| 16      | Bi <sub>24</sub> O <sub>31</sub> Cl <sub>10</sub> | 50        | 5 mL H <sub>2</sub> O, CO <sub>2</sub> gas                                                      | 0.9                                                | -               | -                  | [16] |
| 17      | Bi <sub>4</sub> O <sub>5</sub> Br <sub>2</sub>    | 50        | 5 mL H <sub>2</sub> O, CO <sub>2</sub> gas                                                      | 3.16                                               | 0.5             | -                  | [17] |
| 18      | Bi <sub>12</sub> O <sub>17</sub> Br <sub>2</sub>  | 30        | 50 mL H <sub>2</sub> O, CO <sub>2</sub> gas                                                     | 34.5                                               | -               | -                  | [18] |
| 19      | Bi <sub>4</sub> O <sub>5</sub> Br <sub>2</sub>    | 20        | H <sub>2</sub> O vapor, CO <sub>2</sub> gas                                                     | 31.6                                               | ~0.15           | -                  | [19] |

**BiOX photocatalysts tuned with extrinsic techniques for PCR**

|    |                                      |    |                                                                                                     |       |     |     |      |
|----|--------------------------------------|----|-----------------------------------------------------------------------------------------------------|-------|-----|-----|------|
| 20 | BiOBr/Bi <sub>2</sub> S <sub>3</sub> | 10 | H <sub>2</sub> O vapor, CO <sub>2</sub> gas                                                         | 100.8 | 8.5 | -   | [20] |
| 21 | BiOBr/NiO                            | 20 | 10 mL water, 0.1 g NaHCO <sub>3</sub> , 0.5 mL H <sub>2</sub> SO <sub>4</sub> (2 mol/L)             | 12.8  | 6.6 |     | [21] |
| 22 | BiOBr/Cds                            | 10 | 10 mL H <sub>2</sub> O, CO <sub>2</sub> gas                                                         | 4.5   | -   | -   | [22] |
| 23 | AgBr/BiOBr                           | 10 | H <sub>2</sub> O vapor, CO <sub>2</sub> gas                                                         | 212.6 | 5.7 | -   | [23] |
| 24 | AgBr/BiOBr                           | 15 | 10 mL H <sub>2</sub> O, CO <sub>2</sub> gas                                                         | 12.43 | -   | -   | [24] |
| 25 | BiOBr/CdS diethylenetriamine         | 50 | 10 mL H <sub>2</sub> O, 0.12 g NaHCO <sub>3</sub> , 0.5 mL H <sub>2</sub> SO <sub>4</sub> (2 mol/L) | 19.4  | -   | -   | [25] |
| 26 | CoPc/BiOBr                           | 5  | 200 $\mu$ L H <sub>2</sub> O, CO <sub>2</sub> gas                                                   | 59.9  | -   | -   | [26] |
| 27 | CsPbBr <sub>3</sub> QDs/BiOBr        | 8  | 30 mL ethyl acetate, 100 $\mu$ L H <sub>2</sub> O, CO <sub>2</sub> gas                              | 26.1  | 2.5 | -   | [27] |
| 28 | CdS/BiOBr                            | 20 | 100 mL NaOH (0.1 mol/L), CO <sub>2</sub> gas                                                        | -     | -   | 219 | [28] |

|    |                                                                   |     |                                                                          |        |       |       |      |
|----|-------------------------------------------------------------------|-----|--------------------------------------------------------------------------|--------|-------|-------|------|
| 29 | Bi-Cu <sub>3</sub> SnS <sub>4</sub> /BiOBr                        | 50  | 300 W Xe lamp ( $\lambda > 420$ nm)                                      | 50.13  | -     | -     | [29] |
| 30 | BiOBr/g-C <sub>3</sub> N <sub>4</sub>                             | 20  | 100 mL NaOH (0.1 mol/L), CO <sub>2</sub> gas                             | -      | -     | 267   | [30] |
| 31 | BiOBr/CoAl-LDH                                                    | 15  | 10 mL H <sub>2</sub> O, CO <sub>2</sub> gas                              | 4.1    | 4.2   | -     | [31] |
| 32 | BiOBr/Zn(OH) <sub>2</sub>                                         | 10  | 10 mL H <sub>2</sub> O, CO <sub>2</sub> gas                              | 5.4    | -     | -     | [32] |
| 33 | CdS/BiOCl                                                         | 50  | 10 mL H <sub>2</sub> O, CO <sub>2</sub> gas                              | 0.5    | 1.7   | -     | [33] |
| 34 | CsPbBr <sub>3</sub> /BiOCl                                        | 8   | 30 mL ethyl acetate, 100 $\mu$ L H <sub>2</sub> O, CO <sub>2</sub> gas   | 34.72  | 3.47  | -     | [34] |
| 35 | g-C <sub>3</sub> N <sub>4</sub> /BiOCl                            | 20  | H <sub>2</sub> O vapor, CO <sub>2</sub> gas                              | 4.7    | 0.8   | -     | [35] |
| 36 | CuO/BiOCl                                                         | 50  | 15 mL H <sub>2</sub> O, CO <sub>2</sub> gas                              | -      | 114.1 | 36.2  | [36] |
| 37 | BiOCl/Bi <sub>2</sub> WO <sub>6</sub>                             | 50  | H <sub>2</sub> O vapor, CO <sub>2</sub> gas                              | 0.5    | 1.7   | -     | [37] |
| 38 | WO <sub>x</sub> /BiOCl                                            | 30  | 10 mL H <sub>2</sub> O, CO <sub>2</sub> gas                              | 8.82   | -     | -     | [38] |
| 39 | Bi <sub>4</sub> O <sub>5</sub> Br <sub>2</sub> /AgBr              | 50  | 5 mL H <sub>2</sub> O, CO <sub>2</sub> gas                               | 6.6    | 1.8   | -     | [39] |
| 40 | CPD/Bi <sub>4</sub> O <sub>5</sub> Br <sub>2</sub>                | 30  | 10 mL H <sub>2</sub> O, CO <sub>2</sub> gas                              | 132.42 | -     | -     | [40] |
| 41 | Bi <sub>3</sub> O <sub>4</sub> Cl/g-C <sub>3</sub> N <sub>4</sub> | 50  | 5 mL H <sub>2</sub> O, CO <sub>2</sub> gas                               | 6.6    | 1.9   | -     | [41] |
| 42 | CdS@Bi <sub>24</sub> O <sub>31</sub> Br <sub>10</sub>             | 50  | 12 mL acetonitrile, 4 mL TEA, 4 mL H <sub>2</sub> O, CO <sub>2</sub> gas | 5.8    | -     | -     | [42] |
| 43 | BiOBr-(001)/Bi <sub>2</sub> SiO <sub>5</sub> /Bi                  | 20  | 5 mL H <sub>2</sub> O, CO <sub>2</sub> gas                               | 234.05 | -     | -     | [43] |
| 44 | In <sub>2</sub> O <sub>3</sub> /BiOI                              | 50  | 10% TEOA, CO <sub>2</sub> gas                                            | 11.98  | 5.69  | -     | [44] |
| 45 | Bi <sub>2</sub> MoO <sub>6</sub> /BiOI                            | 20  | H <sub>2</sub> O vapor, CO <sub>2</sub> gas                              | 8.34   | 3.31  | -     | [45] |
| 46 | Pt, N-co-doped BiOCl                                              | 20  | 100 mL NaOH (0.1 mol/L), CO <sub>2</sub> gas                             | -      | -     | 41.1  | [46] |
| 47 | Ni-doped BiOBr                                                    | 5   | 1 mL H <sub>2</sub> O, 4 mL CH <sub>3</sub> CN, 1 mL TEOA, 5 mg          | 378.7  | -     | -     | [47] |
| 48 | Gd-doped BiOBr                                                    | 100 | 60 mL H <sub>2</sub> O, CO <sub>2</sub> gas                              |        |       | 41.24 | [48] |
| 49 | C-doped Bi <sub>24</sub> O <sub>31</sub> Cl <sub>10</sub>         | 50  | 1.7 g NaHCO <sub>3</sub> , 5 mL H <sub>2</sub> SO <sub>4</sub> (4mol/L)  | 2.54   | ~0.74 | -     | [49] |
| 50 | Fe-doped Bi <sub>5</sub> O <sub>7</sub> I                         | 5   | H <sub>2</sub> O vapor, CO <sub>2</sub> gas                              | 12.02  | -     | -     | [50] |
| 51 | Bi <sub>4</sub> O <sub>5</sub> Br <sub>2</sub> /Fe-MIL            | 20  | 20 mL isopropanol, CO <sub>2</sub> gas                                   | -      | 7.96  | -     | [51] |
| 52 | Bi <sub>4</sub> O <sub>5</sub> I <sub>2</sub> -Fe                 | 50  | 5 mL H <sub>2</sub> O, CO <sub>2</sub> gas                               | 23.77  | 4.98  | -     | [52] |
| 53 | B-doped BiOCl                                                     | 50  | 100 mL H <sub>2</sub> O, CO <sub>2</sub> gas                             | 83.64  | -     | -     | [53] |
| 54 | PbBiO <sub>2</sub> Br                                             | 20  | 10 mL H <sub>2</sub> O, CO <sub>2</sub> gas                              | 4.58   | -     | -     | [54] |
| 55 | Au@Bi <sub>12</sub> O <sub>17</sub> Br <sub>2</sub>               | 30  | 1 mL H <sub>2</sub> O, CO <sub>2</sub> gas                               | -      | 2.29  | -     | [55] |
| 56 | Au/BiOCl                                                          | 50  | 3 mL H <sub>2</sub> O, CO <sub>2</sub> gas                               | 3.46   | 1.39  | -     | [56] |
| 57 | Ag-loaded BiOBr                                                   | 30  | 50 mL H <sub>2</sub> O, CO <sub>2</sub> gas                              | 26.8   | -     | -     | [57] |
| 58 | BiOBr <sub>x</sub> Cl <sub>1-x</sub>                              | 10  | H <sub>2</sub> O vapor, CO <sub>2</sub> gas                              | 15.86  | -     | -     | [58] |

## References

1. X. Zhao, Y. Xia, H. Li, X. Wang, J. Wei, X. Jiao and D. Chen, *Appl. Catal. B*, 2021, **297**, 120426.
2. X. Ji, Q. Zhao and A. Wang, *Inorg. Chem. Commun.*, 2021, **132**, 108815.
3. S. Jingke, Z. Zhe, Z. Songsong, N. Bingxuan, D. Han, W. Dapeng and J. Kai, *J. Taiwan Inst. Chem. Eng.*, 2021, **128**, 380-387.
4. Y. Zhong, C. Wu, Y. Feng, D. Chen, Y. Wang, D. Hao and H. Ding, *Appl. Surf. Sci.*, 2022, **585**, 152656.
5. S. Cheng, Z. Sun, K. H. Lim, T. Zhang, E. Hondo, T. Du, L. Liu, M. Judd, N. Cox, Z. Yin, G. K. Li and S. Kawi, *ACS Appl. Nano Mater.*, 2023, **6**, 3608-3617.
6. Y. Shi, J. Li, C. Mao, S. Liu, X. Wang, X. Liu, S. Zhao, X. Liu, Y. Huang and L. Zhang, *Nat. Commun.*, 2021, **12**, 5923.
7. Z. Yajun, X. Zhongfei, W. Qiang, H. Weichang, Z. Xinping, F. Xian, H. Xiaojuan and B. Yingpu, *Appl. Catal. B*, 2021, **299**, 120679.
8. M. Z. Shahid, Z. Chen, R. Mehmood, S. Zheng, A. M. Idris and Z. Li, *Mater. Today Energy*, 2023, **34**, 101303.
9. L. Wang, R. Wang, T. Qiu, L. Yang, Q. Han, Q. Shen, X. Zhou, Y. Zhou and Z. Zou, *Nano Lett.*, 2021, **21**, 10260–10266.
10. J. Zhao, Z. Miao, Y. Zhang, G. Wen, L. Liu, X. Wang, X. Cao and B. Wang, *J. Colloid. Interface Sci.*, 2021, **593**, 231–243.
11. X. Li, K. Li, D. Ding, J. Yan, C. Wang, S. A. C. Carabineiro, Y. Liu and K. Lv, *Sep. Purif. Technol.*, 2023, **309**, 123054.
12. J. Di, C. Chen, C. Zhu, P. Song, J. Xiong, M. Ji, J. Zhou, Q. Fu, M. Xu, W. Hao, J. Xia, S. Li, H. Li and Z. Liu, *ACS Appl. Mater. Interfaces*, 2019, **11**, 30786–30792.
13. Q. Wang, Y. Jin, Y. Zhang, Y. Li, X. Wang, X. Cao and B. Wang, *J. Colloid. Interface Sci.*, 2022, **606**, 1087-1100.
14. L. Wang, G. Liu, B. Wang, X. Chen, C. Wang, Z. Lin, J. Xia and H. Li, *Sol. RRL*, 2020, **5**, 2000480.
15. F. Chen, Z. Ma, L. Ye, T. Ma, T. Zhang, Y. Zhang and H. Huang, *Adv. Mater.*, 2020, **32**, e1908350.
16. X. Jin, C. Lv, X. Zhou, L. Ye, H. Xie, Y. Liu, H. Su, B. Zhang and G. Chen, *ChemSusChem*, 2019, **12**, 2740-2747.
17. X. Jin, C. Lv, X. Zhou, H. Xie, S. Sun, Y. Liu, Q. Meng and G. Chen, *Nano Energy*, 2019, **64**, 103955.
18. J. Di, P. Song, C. Zhu, C. Chen, J. Xiong, M. Duan, R. Long, W. Zhou, M. Xu, L. Kang, B. Lin, D. Liu, S. Chen, C. Liu, H. Li, Y. Zhao, S. Li, Q. Yan, L. Song and Z. Liu, *ACS Mater. Lett.*, 2020, **2**, 1025-1032.
19. Y. Bai, P. Yang, L. Wang, B. Yang, H. Xie, Y. Zhou and L. Ye, *Chem. Eng. J.*, 2019, **360**, 473-482.
20. Z. Miao, Y. Zhang, N. Wang, P. Xu and X. Wang, *J. Colloid. Interface Sci.*, 2022, **620**, 407–418.
21. Z. Wang, B. Cheng, L. Zhang, J. Yu and H. Tan, *Sol. RRL*, 2021, **6**, 2100587.
22. Q. Yang, W. Qin, Y. Xie, K. Zong, Y. Guo, Z. Song, G. Luo, W. Raza, A. Hussain, Y. Ling, J. Luo, W. Zhang, H. Ye and J. Zhao, *Sep. Purif. Technol.*, 2022, **298**, 121603.
23. M. Zerui, W. Qingli, Z. Yanfeng, M. Lingpeng and W. Xuxu, *Appl. Catal. B*, 2021, **301**, 120802.
24. Y. Xie, Y. Zhou, C. Gao, L. Liu, Y. Zhang, Y. Chen and Y. Shao, *Sep. Purif. Technol.*, 2022, **303**, 122288.
25. Y. Huang, J. Zhang, K. Dai, C. Liang and G. Dawson, *Ceram. Int.*, 2022, **48**, 8423-8432.
26. W. Li, X. Li, X. Fu, Z. Lou, Y. Zhu and Y. Zhang, *Chem. Eng. J.*, 2023, **451**, 138932.
27. Z. Zhang, L. Li, Y. Jiang and J. Xu, *Inorg. Chem.*, 2022, **61**, 3351-3360.
28. Y. Xiao, H. Maimaitizi, K. Okitsu, Y. Tursun and A. Abulizi, *Part. Part. Syst. Charact.*, 2022, **39**, 2200019.
29. Z. Li, Y. Rong, J. Liang, Z. Li, J. Wei, J. Li, S. Zhang, T. Liang, Z. Yu and Y. Hou, *J. Environ. Chem. Eng.*, 2022, **10**, 108819.

30. T. zhang, M. Maihemllti, K. Okitsu, D. Talifur, Y. Tursun and A. Abulizi, *Appl. Surf. Sci.*, 2021, **556**, 149828.
31. Y. Lu, D. Wu, Y. Qin, Y. Xie, Y. Ling, H. Ye and Y. Zhang, *Sep. Purif. Technol.*, 2022, **302**, 122090.
32. W. Qin, Q. Yang, H. Ye, Y. Xie, Z. Shen, Y. Guo, Y. Deng, Y. Ling, J. Yu, G. Luo, N. Raza, W. Raza and J. Zhao, *Sep. Purif. Technol.*, 2023, **306**, 122721.
33. S.-S. Wang, X. Liang, Y.-K. Lv, Y.-Y. Li, R.-H. Zhou, H.-C. Yao and Z.-J. Li, *ACS Appl. Energy Mater.*, 2022, **5**, 1149-1158.
34. Y. Jiang, Y. Wang, Z. Zhang, Z. Dong and J. Xu, *Inorg. Chem.*, 2022, **61**, 10557-10566.
35. Y. Chen, F. Wang, Y. Cao, F. Zhang, Y. Zou, Z. Huang, L. Ye and Y. Zhou, *ACS Appl. Energy Mater.*, 2020, **3**, 4610-4618.
36. Y. Song, C. Ye, X. Yu, J. Tang, Y. Zhao and W. Cai, *Appl. Surf. Sci.*, 2022, **583**, 152463.
37. X. Zhao, Y. Xia, X. Wang, N. Wen, H. Li, X. Jiao and D. Chen, *Chem. Eng. J.*, 2022, **449**, 137874.
38. H. Jiang, W. Wang, L. Sun, T. Kong, Z. Lu, H. Tang, L. Wang and Q. Liu, *J. Catal.*, 2022, **416**, 1-10.
39. X. Jin, J. Cao, H. Wang, C. Lv, H. Xie, F. Su, X. Li, R. Sun, S. Shi, M. Dang and L. Ye, *Appl. Surf. Sci.*, 2022, **598**, 153758.
40. B. Wang, J. Zhao, H. Chen, Y.-X. Weng, H. Tang, Z. Chen, W. Zhu, Y. She, J. Xia and H. Li, *Appl. Catal. B*, 2021, **293**, 120182.
41. Y. Xu, X. Jin, T. Ge, H. Xie, R. Sun, F. Su, X. Li and L. Ye, *Chem. Eng. J.*, 2021, **409**, 128178.
42. Q. Mou, Z. Guo, Y. Chai, B. Liu and C. Liu, *Mater. Sci. Semicond. Process.*, 2021, **134**, 106011.
43. X. Guan, X. Zhang, C. Zhang, R. Li, J. Liu, Y. Wang, Y. Wang, C. Fan and Z. Li, *J. Colloid. Interface Sci.*, 2023, **644**, 426-436.
44. N. Sun, M. Zhou, X. Ma, Z. Cheng, J. Wu, Y. Qi, Y. Sun, F. Zhou, Y. Shen and S. Lu, *J. CO<sub>2</sub> Util.*, 2022, **65**, 102220.
45. Z. Wang, B. Cheng, L. Zhang, J. Yu, Y. Li, S. Wageh and A. A. Al-Ghamdi, *Chinese J. Catal.*, 2022, **43**, 1657-1666.
46. H. Maimaitizi, A. Abulizi, K. Kadeer, D. Talifu and Y. Tursun, *Appl. Surf. Sci.*, 2020, **502**, 144083.
47. Y. Wang, Y. Xie, S. Yu, K. Yang, Y. Shao, L. Zou, B. Zhao, Z. Wang, Y. Ling and Y. Chen, *Appl. Catal. B*, 2023, **327**, 122420.
48. J. Wu, Y. Xie, Y. Ling, J. Si, X. Li, J. Wang, H. Ye, J. Zhao, S. Li, Q. Zhao and Y. Hou, *Chem. Eng. J.*, 2020, **400**, 125944.
49. X. Jin, C. Lv, X. Zhou, C. Zhang, B. Zhang, H. Su and G. Chen, *J. Mater. Chem. A*, 2018, **6**, 24350-24357.
50. Y. Wang, C. Ban, J. Meng, J. Ma, H. Zou, Y. Feng, J. Ding, Y. Duan, L. Gan and X. Zhou, *Sep. Purif. Technol.*, 2023, **312**, 123379.
51. X. Li, Y. Tang, Y. Jiang, M. Mu and X. Yin, *Catal. Sci. Technol.*, 2021, **11**, 2864-2872.
52. X. Jin, Y. Xu, X. Zhou, C. Lv, Q. Huang, G. Chen, H. Xie, T. Ge, J. Cao, J. Zhan and L. Ye, *ACS Mater. Lett.*, 2021, **3**, 364-371.
53. Y. Shi, G. Zhan, H. Li, X. Wang, X. Liu, L. Shi, K. Wei, C. Ling, Z. Li, H. Wang, C. Mao, X. Liu and L. Zhang, *Adv. Mater.*, 2021, **33**, 2100143.
54. B. Wang, S.-Z. Yang, H. Chen, Q. Gao, Y.-X. Weng, W. Zhu, G. Liu, Y. Zhang, Y. Ye, H. Zhu, H. Li and J. Xia, *Appl. Catal. B*, 2020, **277**, 119170.
55. Y. Wang, J. Zhao, Y. Liu, G. Liu, S. Ding, Y. Li, J. Xia and H. Li, *J. Colloid. Interface Sci.*, 2022, **616**, 649-658.
56. Y.-l. Li, Y. Liu, H.-y. Mu, R.-h. Liu, Y.-j. Hao, X.-j. Wang, D. Hildebrandt, X. Liu and F.-t. Li, *Nanoscale*, 2021, **13**, 2585-2592.
57. G. Liu, L. Wang, B. Wang, X. Zhu, J. Yang, P. Liu, W. Zhu, Z. Chen and J. Xia, *Chinese Chem. Lett.*, 2023, **34**.
58. M. Gao, J. Yang, T. Sun, Z. Zhang, D. Zhang, H. Huang, H. Lin, Y. Fang and X. Wang, *Appl. Catal. B*, 2019, **243**, 734-740.
